# Supplementary material for: Host migration and environmental temperature influence avian haemosporidians prevalence: a molecular survey in a Brazilian Atlantic rainforest
Source: PeerJ journal article supplement (doi:10.7717/peerj.11555), 2021-06-22
Supplement: TableS1.pdf [file TableS1.pdf]

## SUPPLEMENTARY MATERIALS

### Host migration and environmental temperature influence avian haemosporidian prevalence: a molecular survey in a Brazilian Atlantic Rainforest

Raquel A. Rodrigues<sup>1</sup>, Gabriel M. F. Felix<sup>2</sup>, Mauro Pichorim<sup>3</sup>, Patrícia A. Moreira<sup>4</sup>, Érika M. Braga<sup>1\*</sup>

**Table S1: Migratory birds captured in a bird community in Barreira do Inferno Rocket Launch Center of the Brazilian Air Force, Parnamirim, State of Rio Grande do Norte, Brazil.** The infection status, and parasites' genus and lineages, when identified, are provided. The sample size and number of infections detected in each bird species, and the number of birds infected by a parasite lineage are denoted in parentheses. Because not all diagnosed infections were sequenced, the number of birds in the "Infection Status" column may not be equivalent to the number in the "Lineage" column.

| Host Species                     |                         | Infection Status | Parasite Genus                               | Lineage                                                                                                                                               |
|----------------------------------|-------------------------|------------------|----------------------------------------------|-------------------------------------------------------------------------------------------------------------------------------------------------------|
| Scientific name                  | Common name             |                  |                                              |                                                                                                                                                       |
| <i>Coccyzus melacoryphus</i> (2) | Dark-billed Cuckoo      | Non infected     | -                                            | -                                                                                                                                                     |
| <i>Columbina picui</i> (1)       | Picui dove              | Non infected     | -                                            | -                                                                                                                                                     |
| <i>Cyanerpes cyaneus</i> (1)     | Red-legged Honeycreeper | Infected (1)     | Non sequenced                                | -                                                                                                                                                     |
| <i>Elaenia chilensis</i> (244)   | Chilean Elaenia         | Infected (40)    | <i>Plasmodium</i> and<br><i>Haemoproteus</i> | <i>Plasmodium</i><br>BAFLA03 (1),<br>BAFLA04 (1),<br>PADOM09 (1),<br>PADOM17 (1),<br>TURNUD02,<br><br><i>Haemoproteus</i><br>ELALB01(1),<br>UN203 (1) |
| <i>Elaenia chiriquensis</i> (2)  | Lesser Elaenia          | Non infected     | -                                            | -                                                                                                                                                     |
| <i>Elaenia cristata</i> (96)     | Plain-crested Elaenia   | Infected (12)    | Non sequenced                                | -                                                                                                                                                     |

|                                        |                              |               |                                              |                                                                                         |
|----------------------------------------|------------------------------|---------------|----------------------------------------------|-----------------------------------------------------------------------------------------|
| <i>Elaenia spectabilis</i> (9)         | Large Elaenia                | Infected (2)  | <i>Plasmodium</i>                            | BAFLA04 (1)                                                                             |
| <i>Empidonomus varius</i> (1)          | Variiegated Flycatcher       | Non infected  | -                                            | -                                                                                       |
| <i>Myiarchus tyrannulus</i> (4)        | Brown-crested Flycatcher     | Infected (1)  | <i>Haemoproteus</i>                          | ELALB01 (1)                                                                             |
| <i>Myiodynastes maculatus</i> (1)      | Northern Streaked Flycatcher | Non infected  | -                                            | -                                                                                       |
| <i>Schistochlamys ruficapillus</i> (9) | Cinnamon Tanager             | Infected (2)  | Non sequenced                                | -                                                                                       |
| <i>Tangara sayaca</i> (7)              | Sayaca Tanager               | Non infected  | -                                            | -                                                                                       |
| <i>Turdus amaurochalinus</i> (156)     | Creamy-bellied Thrush        | Infected (20) | <i>Plasmodium</i>                            | U12 (1),<br>TUAMA01 (1),<br>DENPET03 (1)                                                |
| <i>Turdus flavipes</i> (11)            | Yellow-legged Thrush         | Infected (3)  | <i>Plasmodium</i> and<br><i>Haemoproteus</i> | <i>Plasmodium</i><br>DENPET03 (1),<br>PADOM09 (1)<br><i>Haemoproteus</i><br>TARUF02 (1) |
| <i>Vireo chivi</i> (10)                | Red-eyed Vireo               | Infected (5)  | <i>Haemoproteus</i>                          | VIREO02 (1)                                                                             |
