# Supplementary material for: Host migration and environmental temperature influence avian haemosporidians prevalence: a molecular survey in a Brazilian Atlantic rainforest
Source: PeerJ journal article supplement (doi:10.7717/peerj.11555), 2021-06-22
Supplement: TableS3.pdf [file TableS3.pdf]

## SUPPLEMENTARY MATERIALS

### Host migration and environmental temperature influence avian haemosporidian prevalence: a molecular survey in a Brazilian Atlantic Rainforest

Raquel A. Rodrigues<sup>1</sup>, Gabriel M. F. Felix<sup>2</sup>, Mauro Pichorim<sup>3</sup>, Patrícia A. Moreira<sup>4</sup>, Érika M. Braga<sup>1\*</sup>

**Table S3. Backward selection of the main effects influencing the probability of infection by *Haemoproteus (Parahaemoproteus) sp.*** The full random structure was maintained in all models. The Plas.Glmm1 model starts with all main effects (fixed factors), which were sequentially removed. In each step we removed the main effect that explained the small amount of deviance (indicated on the Fixed Factors column). The procedure was repeated until no effect could be removed without causing significant loss of model fit (indicated by the p value column). In this case, this happened only when migratory status was removed from the model, although the improvement in deviance provided by Body mass and Breeding period is marginally significant, indicating a possible role of these factors in the probability of infection by *Haemoproteus (Parahaemoproteus) sp.*

| Model                    | Fixed Factors      | Deviance | Chisq | DF | P       |
|--------------------------|--------------------|----------|-------|----|---------|
| <b>Para.Glmm1</b>        | Full <sup>†</sup>  | 180.31   |       |    |         |
| <b>Para.Glmm2</b>        | - Precipitation    | 180.44   | 0.133 | 1  | 0.715   |
| <b>Para.Glmm3</b>        | - Nest shape       | 181.36   | 0.916 | 1  | 0.338   |
| <b>Para.Glmm4</b>        | - Age              | 182.34   | 0.979 | 1  | 0.322   |
| <b>Para.Glmm5</b>        | - Temperature      | 183.07   | 0.735 | 1  | 0.391   |
| <b>Para.Glmm6</b>        | - Body mass        | 185.83   | 2.754 | 1  | 0.096   |
| <b>Para.Glmm7</b>        | - Breeding period  | 190.34   | 4.643 | 2  | 0.098   |
| <b>Para.Glmm8 (null)</b> | - Migratory status | 200.34   | 9.867 | 1  | 0.001** |

<sup>†</sup>Full model: *Parahaemoproteus sp.* Infection status ~ Intercept + Age + Precipitation + Migratory Status + Nest Shape + Body mass + Breeding Period + Temperature + (Intercept|Season/Month) + (Intercept|Order/Family/Genus/Species), family = binomial(link = "logit").
