# Supplementary material for: Host migration and environmental temperature influence avian haemosporidians prevalence: a molecular survey in a Brazilian Atlantic rainforest
Source: PeerJ journal article supplement (doi:10.7717/peerj.11555), 2021-06-22
Supplement: TableS4.pdf [file TableS4.pdf]

## SUPPLEMENTARY MATERIALS

### Host migration and environmental temperature influence avian haemosporidian prevalence: a molecular survey in a Brazilian Atlantic Rainforest

Raquel A. Rodrigues<sup>1</sup>, Gabriel M. F. Felix<sup>2</sup>, Mauro Pichorim<sup>3</sup>, Patrícia A. Moreira<sup>4</sup>, Érika M. Braga<sup>1\*</sup>

**Table S4. Adjusted intra-class correlation ( $ICC_{adj}$ ) of temporal and taxonomic factors.** The factors were considered as two dimensions of the random structure of the models built to analyze the factors predicting the probability of infection by *Plasmodium* and *Haemoproteus* in a bird community in Barreira do Inferno Rocket Launch Center of the Brazilian Air Force, Parnamirim, State of Rio Grande do Norte, Brazil.

| Dimension | Random Factor        | $ICC_{adj}$              | $ICC_{adj}$                    |
|-----------|----------------------|--------------------------|--------------------------------|
|           |                      | ( <i>Plasmodium</i> sp.) | ( <i>Parahaemoproteus</i> sp.) |
| Temporal  | Season               | 0                        | 0                              |
|           | Month:Season         | 0                        | 0                              |
| Taxonomic | Family               | 0                        | 0                              |
|           | Genus:Family         | 0                        | 0                              |
|           | Species:Genus:Family | 0.1728                   | 0                              |
